# Supplementary material for: Targeted nanopore sequencing for the identification of ABCB1 promoter translocations in cancer
Source: PubMed Central journal article supplement (PMC7654162; doi:10.1186/s12885-020-07571-0), 2020-11-10
Supplement: 12885_2020_7571_MOESM5_ESM.pdf [file 12885_2020_7571_MOESM5_ESM.pdf]

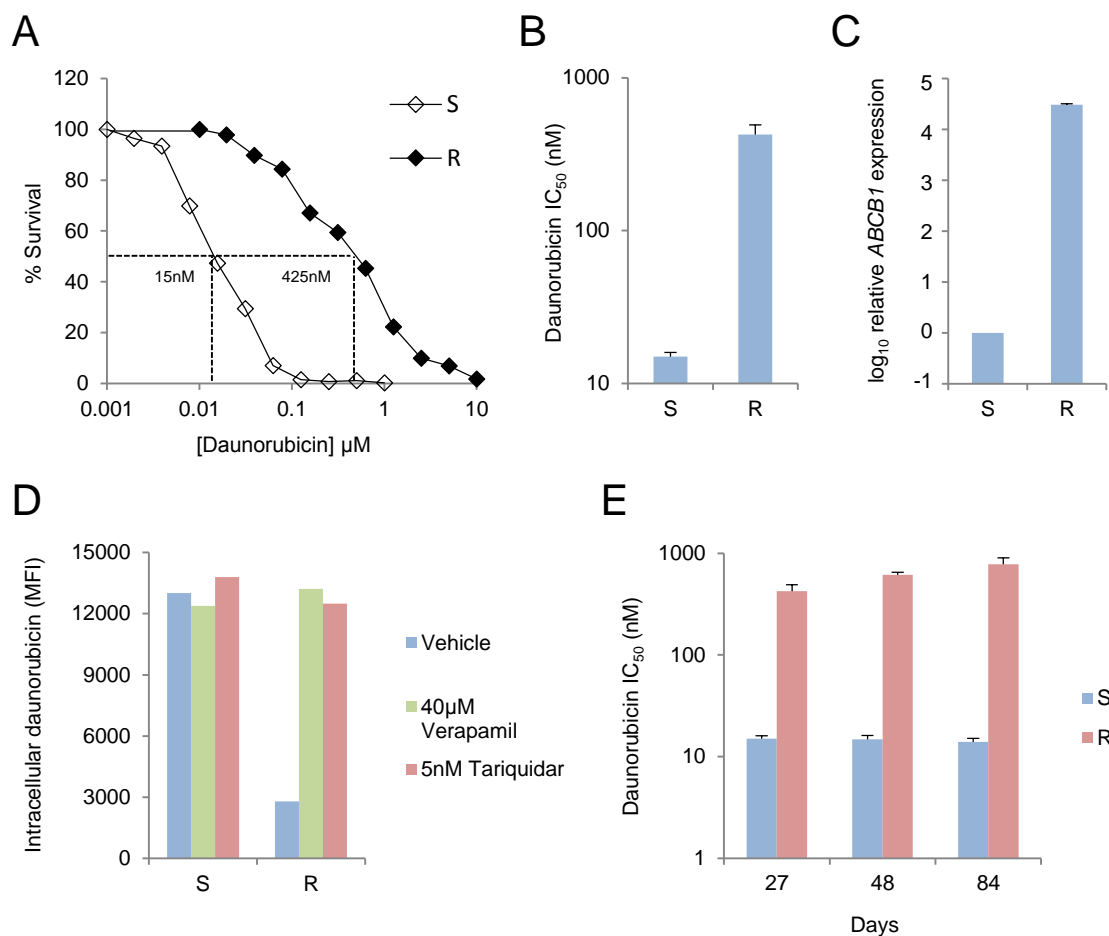

**Figure S1.** Induction of *ABCB1* in THP-1 AML cells with escalating daunorubicin exposure

(A) Dose response curves for sensitive and resistant lines following 72hr treatment with the indicated dose of daunorubicin. Survival was determined using a resazurin cell viability assay. (B) Bar chart shows mean $\pm$ SEM  $\text{IC}_{50}$  values for sensitive and resistant lines (n=4). (C) Mean $\pm$ SEM fold increase in *ABCB1* expression, as determined by quantitative PCR (n=4). (D) Bar chart shows median fluorescence intensity (MFI) of intracellular daunorubicin following incubation of the indicated cell lines with 1 $\mu\text{M}$  daunorubicin in the presence or absence of verapamil 40 $\mu\text{M}$  or tariquidar 5nM for 2 hours, as determined by flow cytometry. (E) Bar chart shows mean $\pm$ SEM  $\text{IC}_{50}$  values for daunorubicin for THP-1\_S or THP1\_R cells propagated for the indicated number of days in the absence of daunorubicin (n=4).
