# Supplementary material for: Targeted nanopore sequencing for the identification of ABCB1 promoter translocations in cancer
Source: Springer Nature journal article supplement (doi:10.1186/s12885-020-07571-0), 2020-11-10
Supplement: MOESM6 [file 18573118]

A

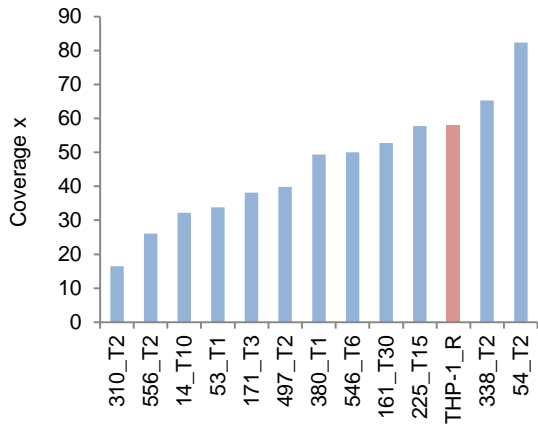

B

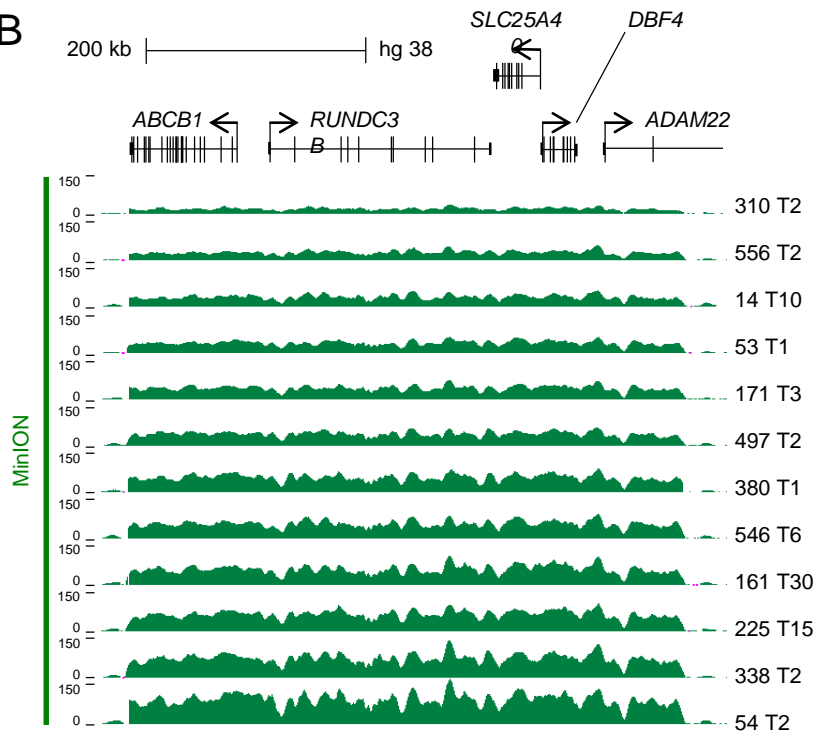

**Figure S2.** Nanopore sequencing of *ABCB1*<sup>high</sup> related AML

(A) Bar chart shows coverage of the targeted locus achieved by nanopore sequencing in the indicated patient samples (blue) and THP-1\_R (red). (B) Tracks show the 500kb region surrounding *ABCB1* targeted for sequencing and the coverage achieved using long-read nanopore sequencing (MinION) of the indicated *ABCB1*<sup>high</sup> related AML samples.
